# Supplementary material for: A highly recurrent RPS27 5'UTR mutation in melanoma
Source: PubMed Central journal article supplement (PMC4102779; doi:10.18632/oncotarget.2048), 2014-06-01
Supplement: oncotarget-05-2912-s001.pdf [file oncotarget-05-2912-s001.pdf]

# Supplementary Figure 1

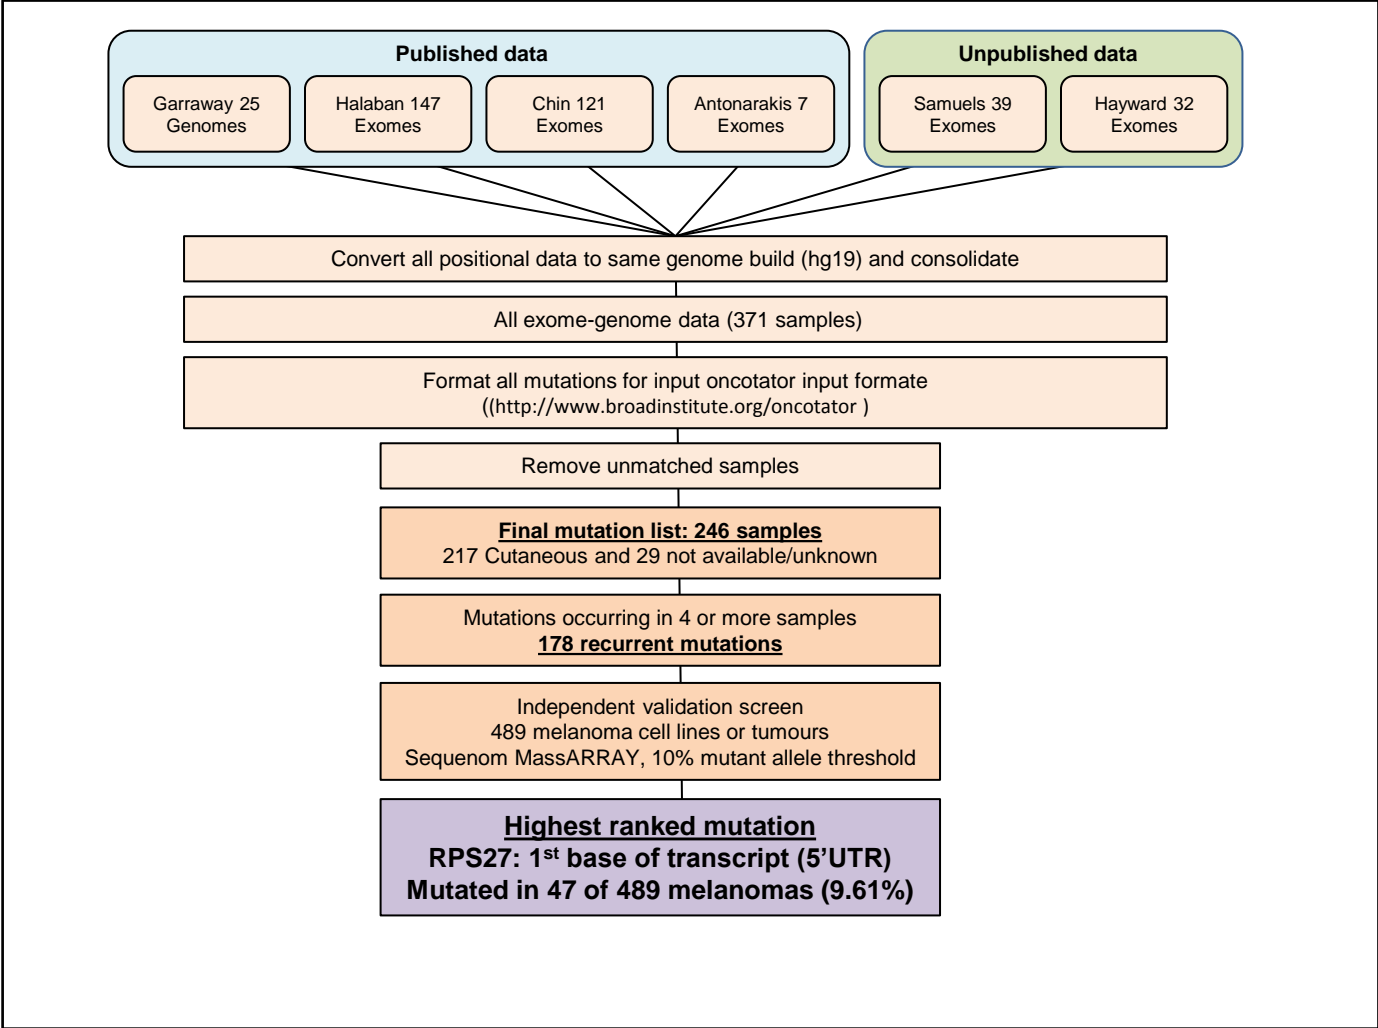

## Supplementary Figure 2

**A.** Forward- 5' ACGTTGGATGTCATTTCTGTAGTGTGCTC  
Reverse- 5' ACGTTGGATGGCCGAAACCTGGACCAAAG  
Extension- 5' GAGGAGGTCGTCA CCGCCGGAAA

**B.**

**chr1:153963178-153963314**

chr1:153963239

GTCATTTCTGTAGTGTGCTCtatataaggggacaggatttccgctttcgctcct 54  
ttccggcgggtgacgacctacgcacacgagaacatgcctgtgagtgCTTTGGTCC 108  
AGGTTTCGGC 118

**C.**

| SCORE | START | END | QSIZE | IDENTITY | CHR. | STRAND | START     | END       | SPAN |
|-------|-------|-----|-------|----------|------|--------|-----------|-----------|------|
| 118   | 1     | 118 | 118   | 100.0%   | 1    | +      | 153963187 | 153963304 | 118  |
| 38    | 53    | 92  | 118   | 97.5%    | 12   | -      | 3321078   | 3321117   | 40   |
| 37    | 52    | 92  | 118   | 95.2%    | 11   | -      | 116906762 | 116906802 | 41   |
| 35    | 54    | 92  | 118   | 94.9%    | 1    | -      | 202441240 | 202441278 | 39   |
| 32    | 52    | 92  | 118   | 84.3%    | 1    | +      | 38021815  | 38021853  | 39   |

**Validation of the specificity of the oligos used for the sequenom analysis, to the mutation region of *RPS27* gene.** **A.** description of the sequence used for sequenom analysis. **B.** the sequence of the amplified genomic region as obtained from the *in silico* PCR analysis. The sequence of the primers is described as Caps letters. The genomic location of the mutation is pointed by an arrow. **C.** BLAT analysis of the amplified region of *RPS27* gene used as a template for the extension step. The table describe the location and % of identity of the different homologous regions in the genome to the *RPS27* gene. The *in silico* PCR and the BLAT analysis were performed using the UCSC website (<http://genome.ucsc.edu/index.html>).
